# Supplementary material
Source: PubMed Central journal article supplement (PMC8516457)
Supplement: jci-131-145035-s065.pdf [file jci-131-145035-s065.pdf]

# Supplemental Figure 1

**A**

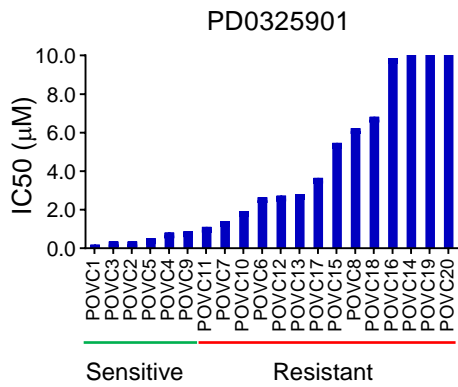

**C**

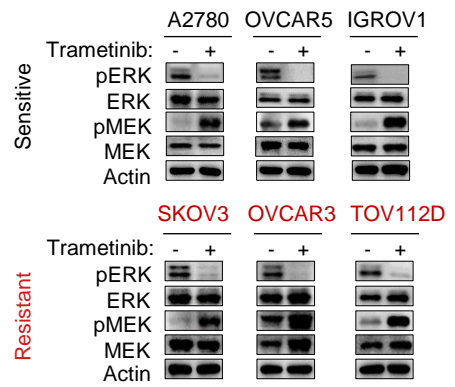

**B**

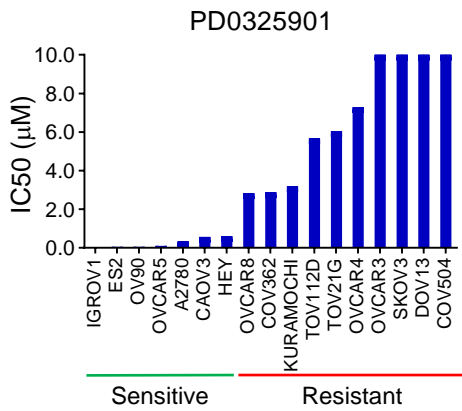

**D**

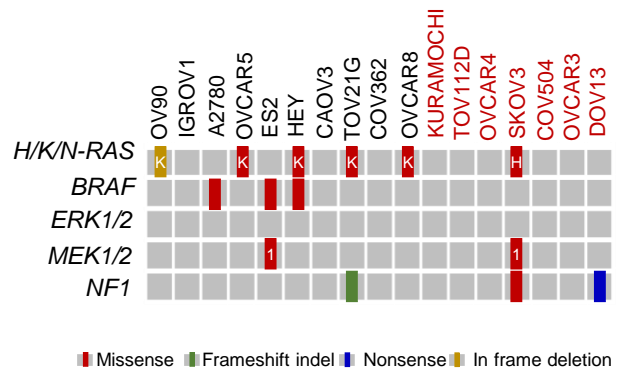

**E**

| Genes            | Sensitive (n=10) | Resistant (n=7) | P value |
|------------------|------------------|-----------------|---------|
| <i>H/K/N-RAS</i> |                  |                 |         |
| mutation         | 5                | 1               | 0.3043  |
| non-mutation     | 5                | 6               |         |
| <i>BRAF</i>      |                  |                 |         |
| mutation         | 3                | 0               | 0.2279  |
| non-mutation     | 7                | 7               |         |
| <i>ERK1/2</i>    |                  |                 |         |
| mutation         | 0                | 0               | 1.00    |
| non-mutation     | 10               | 7               |         |
| <i>MEK1/2</i>    |                  |                 |         |
| mutation         | 1                | 0               | 1.00    |
| non-mutation     | 9                | 7               |         |
| <i>NF1</i>       |                  |                 |         |
| mutation         | 1                | 1               | 1.00    |
| non-mutation     | 9                | 6               |         |

**F**

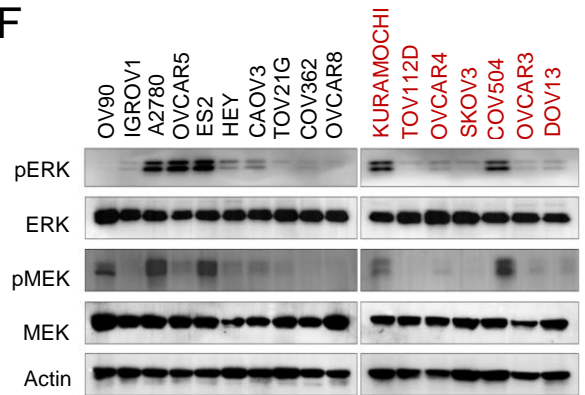

**G**

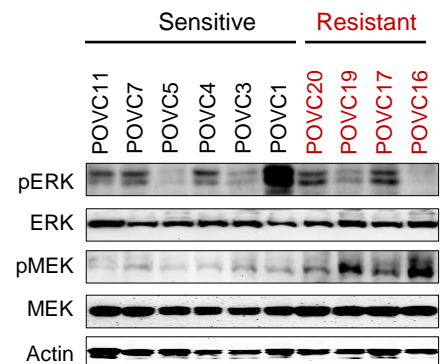

## Supplemental Figure 1

**Supplemental Figure 1. In vitro effect of MEK inhibitor in OV models. (A-B)** In vitro sensitivity to PD0325901 in 20 patient-derived primary cells (A) and 17 commercial ovarian cell lines (B). The half maximal inhibitory concentration (IC<sub>50</sub>) values for PD0325901 represented on the y-axis. Data represent the mean of 3 biological replicates. The cut-off value of IC<sub>50</sub> for sensitivity is 1.0  $\mu$ M. (C) Immunoblot analysis of the indicated antibodies of protein lysates from different cell lines treated with 0.5  $\mu$ M trametinib for 6 hr. (D) Sensitive (black) and resistant (red) commercial cell lines are in order of their IC<sub>50</sub> of trametinib. Illustrated are mutation profiles of *H/K/N-RAS*, *RAF*, *MEK1/2*, *ERK1/2* and *NF1*. (E) Fisher exact test was used for the association between gene mutation (*H/K/N-RAS*, *RAF*, *MEK1/2*, *ERK1/2* and *NF1*) and trametinib IC<sub>50</sub> in cell lines described in (D) was shown in the table. (F-G) Immunoblot analysis of indicated proteins in sensitive (black) and resistant (red) cells, (F) OV commercial cell lines; (G) OV patient-derived cells.

## Supplemental Figure 2

A

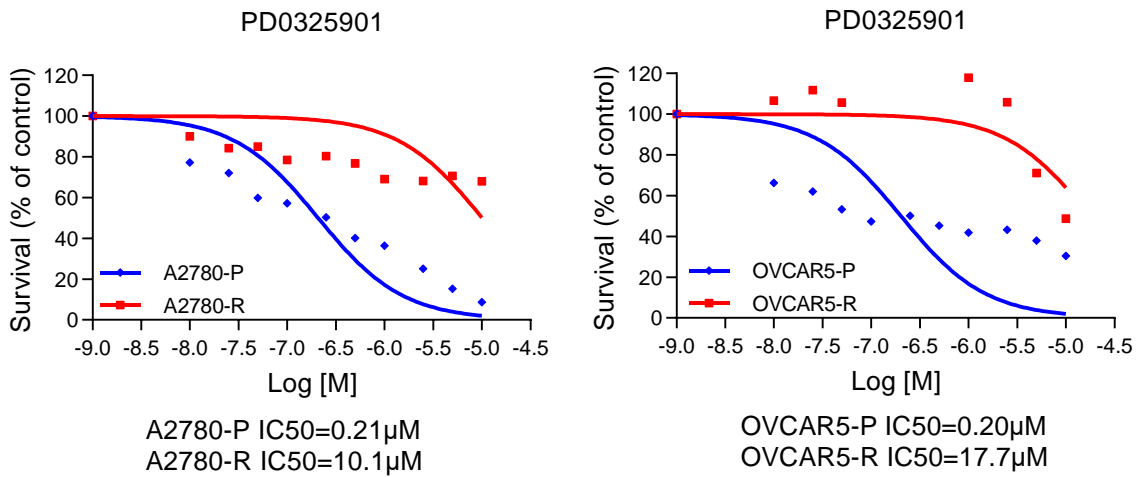

B

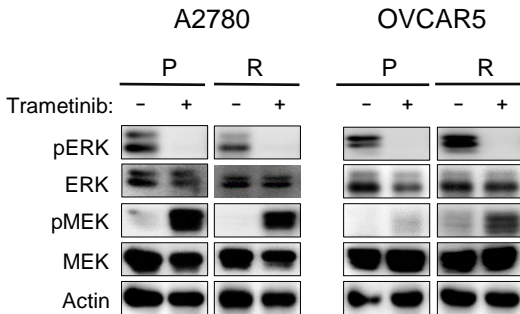

**Supplemental Figure 2. Persistent ERK activation is associated with acquired resistance to MEK inhibitor in OV.** (A) A2780-P, A2780-R, OVCAR5-P, and OVCAR5-R cells were treated with the escalating concentrations of PD0325901 for 96 hr. Viability was assessed using Cell-Titer Glo as described by the manufacturer. Data represent the mean of 3 biological replicates. (B) A2780-P, A2780-R, OVCAR5-P, and OVCAR5-R cells were treated with 0.5 μM trametinib for 6 hr. Cell extracts were assayed by immunoblotting to detect the indicated proteins.

## Supplemental Figure 3

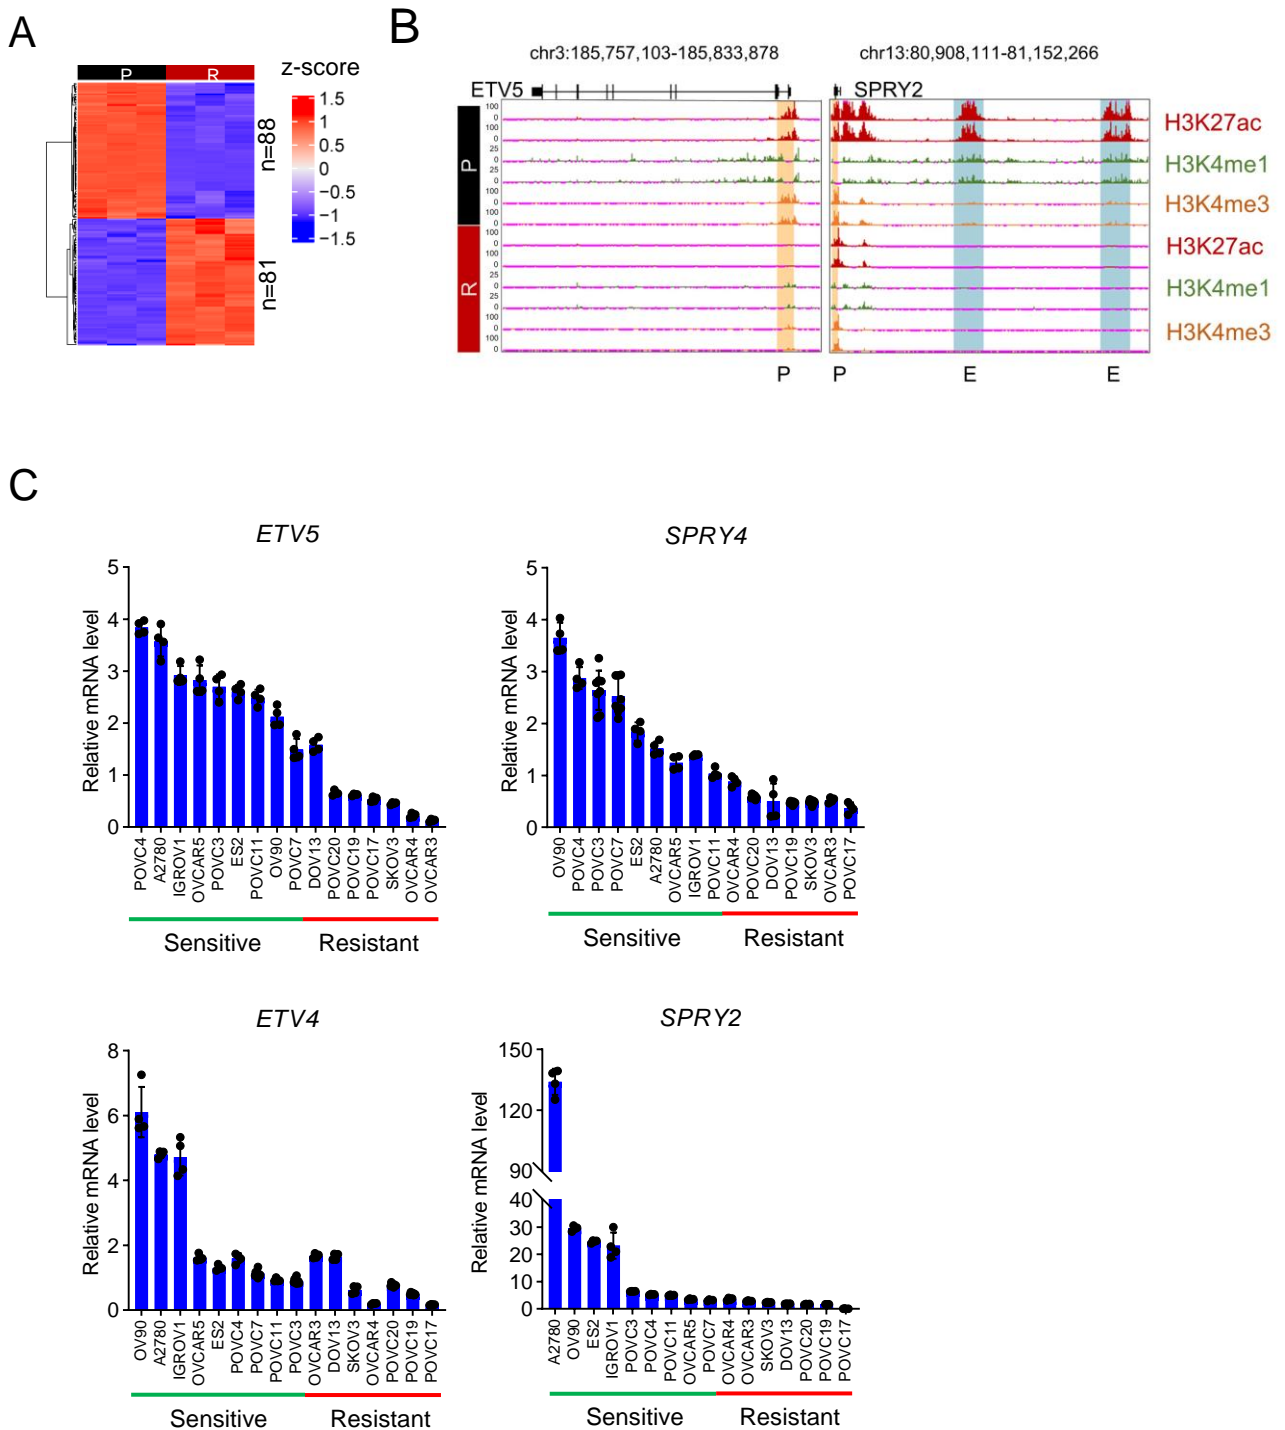

**Supplemental Figure 3. Enhancer reprogramming accompanies acquired resistance to MEK inhibitors.** (A) Heatmap of differentially expressed genes (DEGs) upon H3K27ac changes (by at least 50 CPM, comparing resistant and parental). DEGs are defined by the criteria:  $|\log_2 \text{fold-change}| \geq 1$  and adjusted p-value  $\leq 0.05$ , RNA-seq was performed in biological triplicates. (B) ChIP-seq profiling showed the ChIP-seq signal (y-axis, reads per million [rpm]) for H3K27ac, H3K4me1 and H3K4me3 at genomic loci of *ETV5* and *SPRY2*. (C) Relative mRNA levels of *ETV5*, *SPRY4*, *ETV4*, and *SPRY2* in 9 sensitive and 7 resistant cells, including OV commercial cell lines and patient-derived cells. Results are represented as mean  $\pm$  SD of four independent experiments.

# Supplemental Figure 4

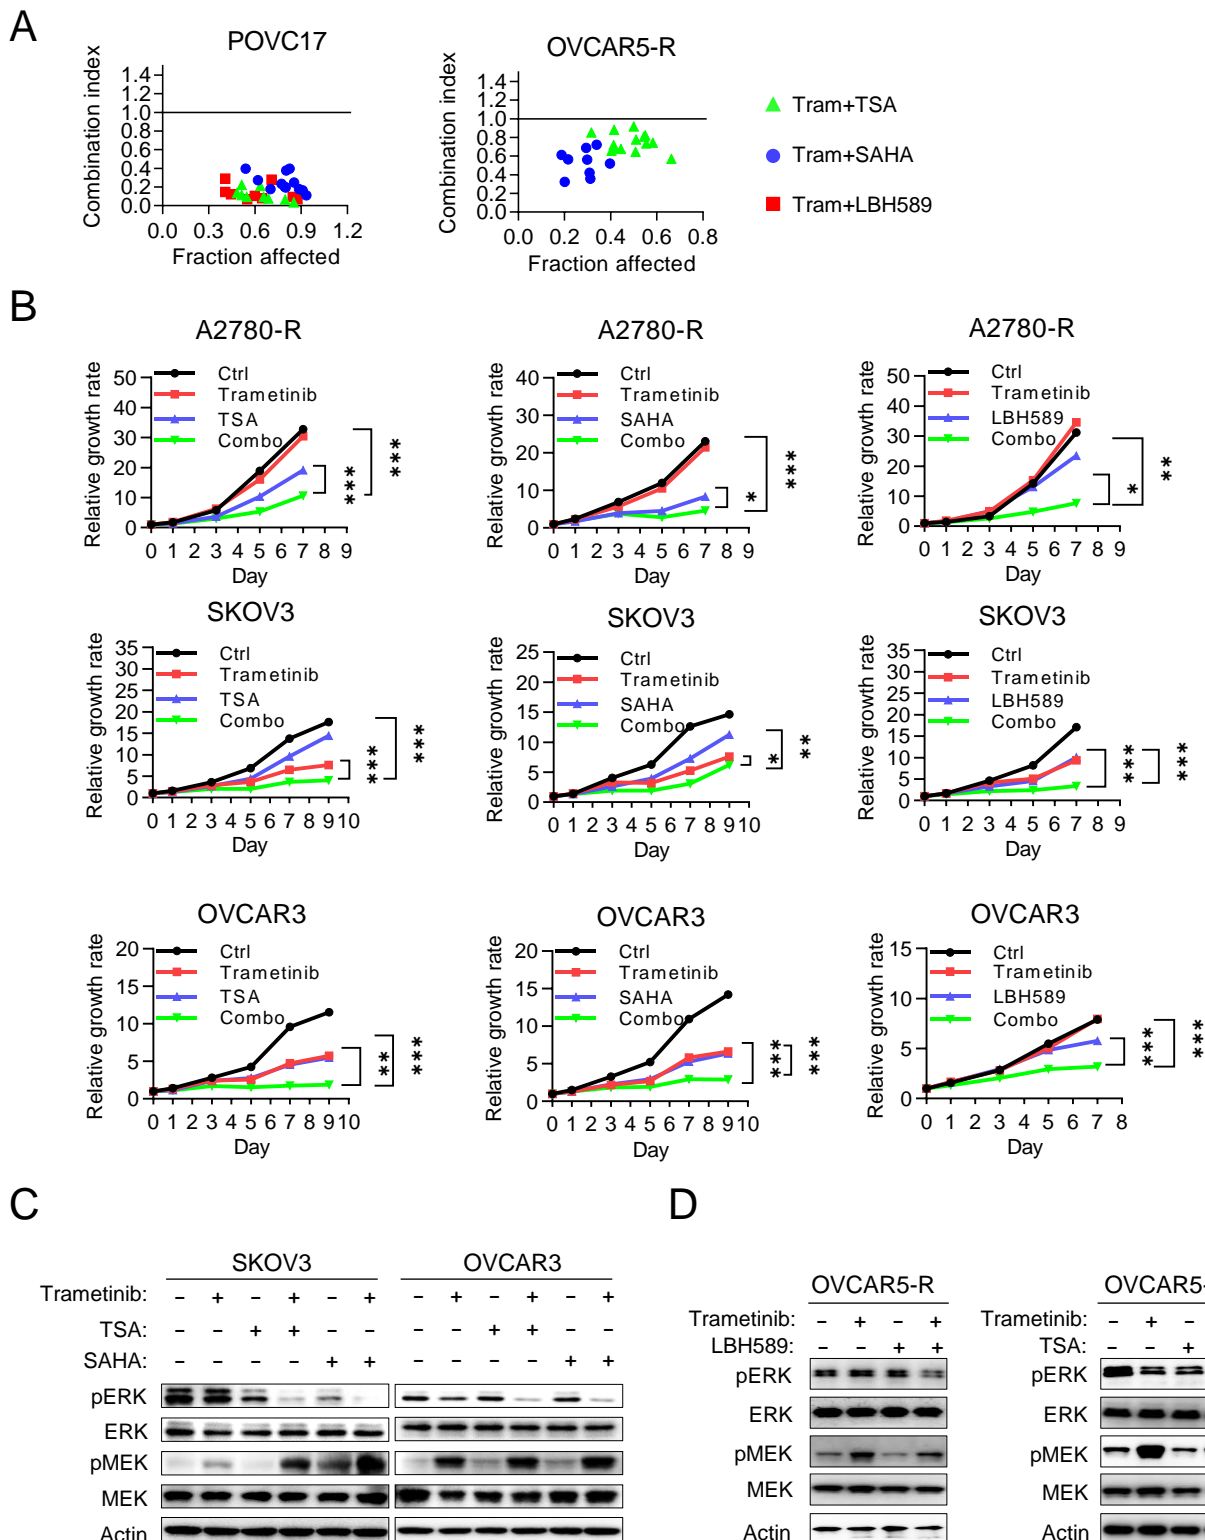

## Supplemental Figure 4

### Supplemental Figure 4. HDACi inhibition sensitizers trametinib-resistant cells in

**vitro.** (A) Combination index of MEK and HDAC inhibitors in patient-derived cells POVC17 (left) and acquired resistant cells OVCAR5-R (right). Combination index values were calculated using Calcosyn Software. Combination index  $> 1$  was antagonism, combination index  $< 1$  was defined as synergy. (B) Growth curves of A2780-R, SKOV3, and OVCAR3 treated with either vehicle, trametinib, HDACi or their combination. \* $p < 0.05$ , \*\* $p < 0.01$ , \*\*\* $p < 0.001$  by 2-way ANOVA with Tukey post hoc test. (C) Immunoblot analysis for ERK and MEK activity for SKOV3 (left) and OVCAR3 (right) treated with either vehicle, 100 nM trametinib, HDACi (100 nM TSA or 1  $\mu$ M SAHA), or their combination for 72 hr. (D) Immunoblot analysis of ERK and MEK activity in OVCAR5-R treated with either vehicle, 50 nM trametinib, HDACi (25 nM LBH589 or 25 nM TSA) or their combination for 48 hr.

# Supplemental Figure 5

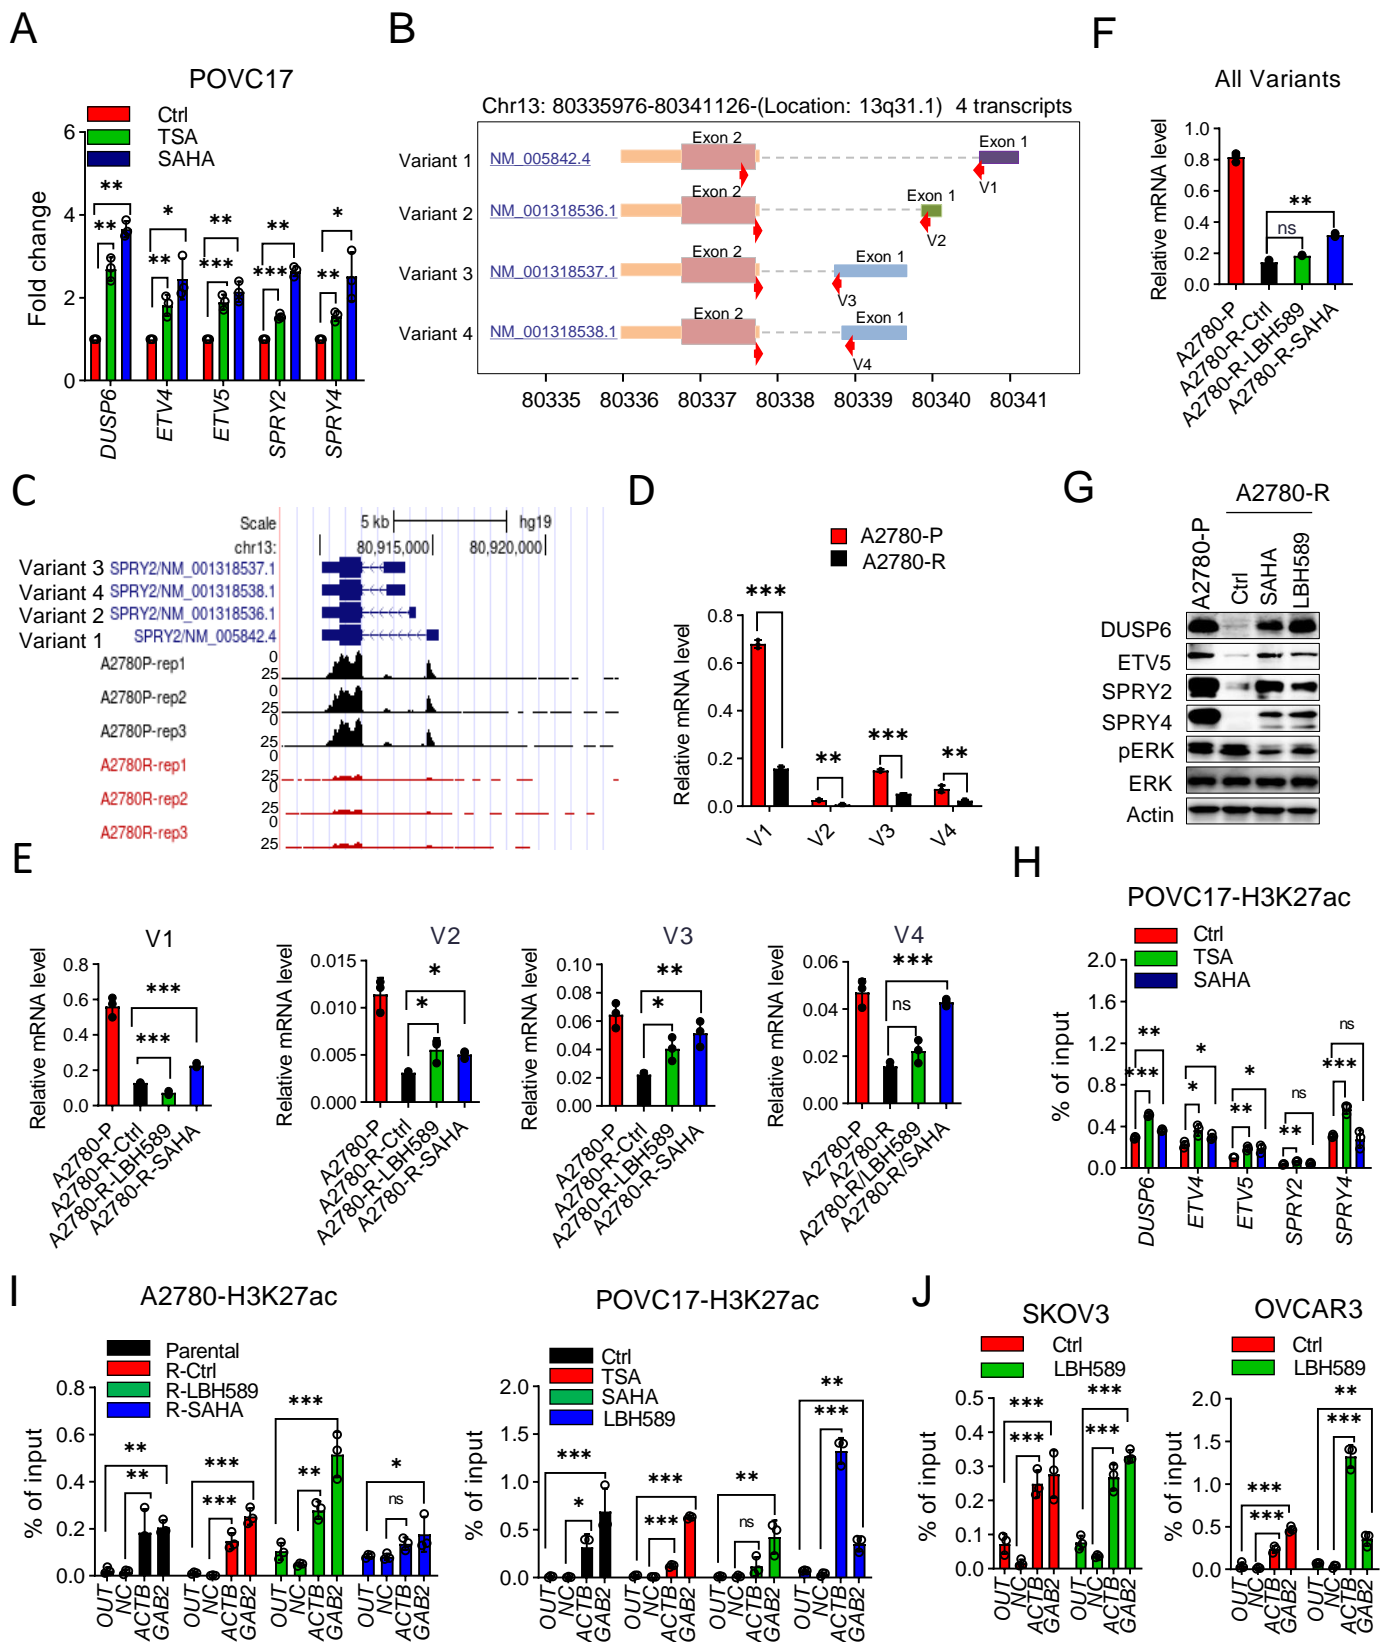

**Supplemental Figure 5. HDAC inhibitors reactivate repressive enhancers in Ovarian cancer-resistant cells.** qRT-PCR analysis (A) and ChIP-qPCR of H3K27ac binding (H) of MAPK negative regulators in patient-derived cells POVC17 treated with either vehicle, TSA (25 nM) or SAHA (1  $\mu$ M) for 72 hr. (B) The schematic of transcript variants and primers designed in the human *SPRY2* gene. There are four transcript variants encoding the same protein in *SPRY2* gene. The accession numbers are NM\_005842.3 (variant 1), NM\_001318536.1 (variant 2), NM\_001318537.1 (variant 3) and NM\_001318538.1 (variant 4). All these *SPRY2* transcript variants consist of two exons. *SPRY2* primers (named V1) only detect *SPRY2* transcript 1. The additional 3 pairs of primers named V2, V3 or V4 specifically amplify *SPRY2* transcript 2, 3 or 4, respectively. (C) RNA-seq profiles show the RNA-seq signal (y-axis, reads per million [rpm]) for different variants of *SPRY2* in A2780-P and A2780-R cells. (D) Relative mRNA levels of different variants of *SPRY2* in A2780-P and A2780-R cells. (E) qRT-PCR analysis of different variants of *SPRY2* in A2780-P and A2780-R cells treated with vehicle, SAHA (1  $\mu$ M) or LBH589 (100 nM) for 24 hr. (F) qRT-PCR analysis using the All Variants primers which covered all variants of *SPRY2* in A2780-P and A2780-R cells treated with vehicle, SAHA (1  $\mu$ M) or LBH589 (100 nM) for 24 hr. (G) Immunoblot analysis of indicated proteins in A2780-P cells and A2780-R cells treated with vehicle, SAHA (1  $\mu$ M) or LBH589 (100 nM) for 24 hr. (H, I) ChIP-qPCR of H3K27Ac binding in OUT, NC (negative control) and ACTB, GAB2 (positive control) for the experiment described in (Figure 5, C and D, and Supplemental Figure 5H). (A, D-F, H-J) Results expressed as mean  $\pm$  SD of three biological replicates. ns, not significant; \* $p$  < 0.05, \*\* $p$  < 0.01, \*\*\* $p$  < 0.001; (A, E, F, H-J) 1-way ANOVA with Bonferroni's post hoc test; (D) unpaired Student's t-test.



## Supplemental Figure 6

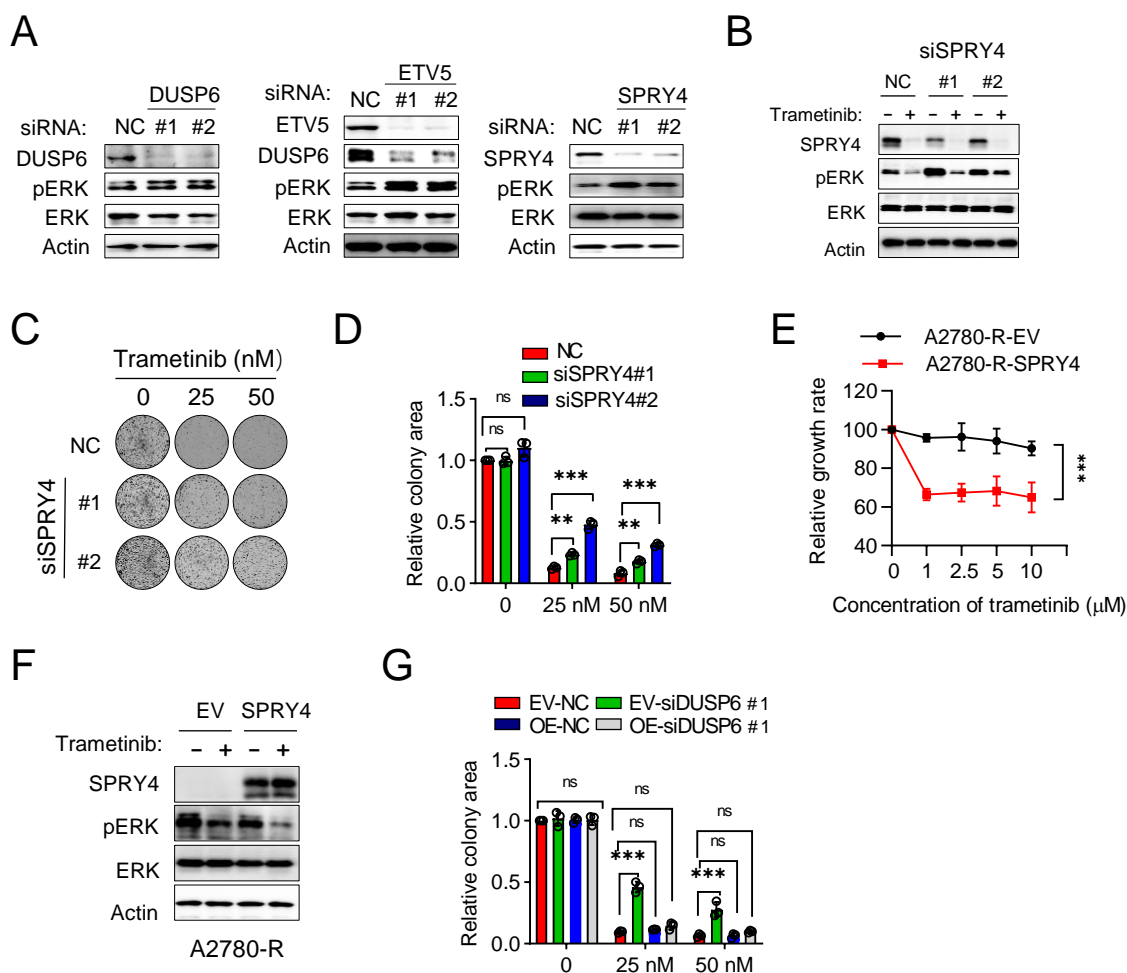

**Supplemental Figure 6. Effects of gain- and loss-of-function of MAPK negative regulators on trametinib resistance.** (A) Immunoblot analysis of indicated proteins in A2780-P cells transfected with either siNC, siDUSP6 (left), or siETV5 (medium) or siSPRY4 (right), respectively. (B) Immunoblot analysis of indicated proteins in A2780-P cells treated with trametinib after transfection with either siNC or siSPRY4. Representative images (C) and quantification (D) of colony formation assay in A2780-P cells treated with trametinib after transfection with either siNC or siSPRY4. (E) Cell viability assay of *SPRY4* re-expression in A2780-R cells on trametinib sensitivity. (F) Immunoblot analysis of indicated proteins in A2780-R cells with *SPRY4* re-expression and subsequently treated with vehicle or trametinib (25 nM 48 hr). (G) Quantification of colony formation assay described in (Figure 5, J and K). (D, E, G) Results expressed as mean  $\pm$  SD of three biological replicates. ns, not significant; \*\* $p < 0.01$ , \*\*\* $p < 0.001$ ; (D, G) 1-way ANOVA with Bonferroni's post hoc test; (E) 2-way ANOVA with Bonferroni's post hoc test.

## Supplemental Figure 7

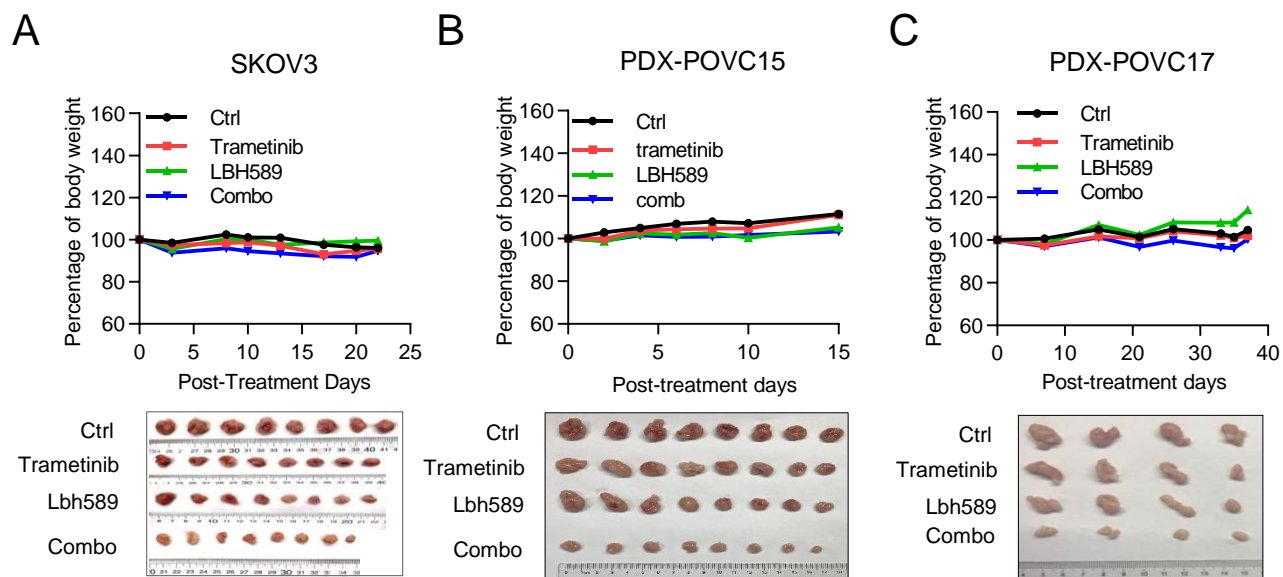

**Supplemental Figure 7. HDACi inhibition sensitizes trametinib-resistant cells in vivo.** (A-C) Relative weight measurements of mice (upper) and the excised tumors at the termination day (lower) from the experiment described in (Figure 6, A-C), respectively.

**Supplementary Table 1. Summary of the clinical and pathological characteristics for OV patient-derived cells**

| ID     | Clinical Attributes |                             | Pathological Characteristics |            |            |         | IC50       |           |
|--------|---------------------|-----------------------------|------------------------------|------------|------------|---------|------------|-----------|
|        | Age                 | Histopathological diagnosis | P53                          | PAX8       | WT1        | ki67    | Trametinib | PD0325901 |
| POVC1  | 37                  | HGSOC                       | -                            | +          | +          | NA      | 0.03982    | 0.1969    |
| POVC2  | 60                  | HGSOC                       | +                            | +          | +          | 10+     | 0.04906    | 0.3615    |
| POVC3  | 40                  | HGSOC                       | 70%+                         | +          | +          | 30+     | 0.12       | 0.3531    |
| POVC4  | 48                  | HGSOC                       | 15%+                         | +          | +          | 30+     | 0.1228     | 0.8215    |
| POVC5  | 44                  | HGSOC                       | +                            | +          | +          | 75+     | 0.1453     | 0.5254    |
| POVC6  | 56                  | HGSOC                       | -                            | NA         | partially+ | NA      | 0.1517     | 2.648     |
| POVC7  | 47                  | HGSOC                       | +                            | +/-        | NA         | NA      | 0.224      | 1.403     |
| POVC8  | 60                  | HGSOC                       | NA                           | NA         | NA         | NA      | 0.2302     | 6.223     |
| POVC9  | 57                  | HGSOC                       | NA                           | +          | +          | NA      | 0.3213     | 0.8891    |
| POVC10 | 37                  | HGSOC                       | -                            | +          | +          | 30+     | 0.5582     | 1.925     |
| POVC11 | 45                  | HGSOC                       | +                            | +          | +          | 15+     | 0.5886     | 1.113     |
| POVC12 | 46                  | HGSOC                       | 80%+                         | +          | +          | 40-80%+ | 2.369      | 2.726     |
| POVC13 | 46                  | HGSOC                       | 90%+                         | +          | +          | 10-20%+ | 3.127      | 2.809     |
| POVC14 | 35                  | HGSOC                       | 70%+                         | +          | +          | 60+     | 6.491      | 11.27     |
| POVC15 | 52                  | HGSOC                       | 70%+                         | NA         | +          | 60%+    | 6.55       | 5.469     |
| POVC16 | 59                  | HGSOC                       | 5%+                          | partially+ | partially+ | 30+     | 8.788      | 9.886     |
| POVC17 | 52                  | HGSOC                       | -                            | +          | +          | 40%+    | 9.91       | 3.653     |
| POVC18 | 82                  | HGSOC                       | +                            | +          | +          | NA      | 9.986      | 6.83      |
| POVC19 | 56                  | HGSOC                       | +                            | +          | +          | 30+     | 10         | 28.46     |
| POVC20 | 44                  | HGSOC                       | 70%+                         | diffuse+   | +          | 70+     | 10.51      | 100       |

NA: not available

**Supplementary Table 2: Epigenetic Drug screen in A2780-R**

| NO. | Drugs                     | Target                    | Single Survival rate(%) | Combination Survival rate (%) | S/C score | ln(S/C score) |
|-----|---------------------------|---------------------------|-------------------------|-------------------------------|-----------|---------------|
| 1   | Trichostatin A (TSA)      | HDAC                      | 0.9230                  | 0.0978                        | 9.4380    | 2.2447        |
| 2   | JIB-04                    | Histone Demethylase       | 9.7453                  | 1.9674                        | 4.9533    | 1.6001        |
| 3   | Panobinostat (LBH589)     | HDAC                      | 3.3087                  | 1.2800                        | 2.5850    | 0.9497        |
| 4   | Pracinostat (SB939)       | HDAC                      | 30.6843                 | 13.7936                       | 2.2245    | 0.7995        |
| 5   | (+)-JQ1                   | Epigenetic Reader Domain  | 42.9168                 | 22.6734                       | 1.8928    | 0.6381        |
| 6   | Belinostat (PXD101)       | HDAC                      | 36.4702                 | 19.6522                       | 1.8558    | 0.6183        |
| 7   | OTX015                    | Epigenetic Reader Domain  | 49.3701                 | 29.0618                       | 1.6988    | 0.5299        |
| 8   | PFI-1 (PF-6405761)        | Epigenetic Reader Domain  | 107.1497                | 65.5921                       | 1.6336    | 0.4908        |
| 9   | Entinostat (MS-275)       | HDAC                      | 67.3340                 | 41.7697                       | 1.6120    | 0.4775        |
| 10  | OF-1                      | Epigenetic Reader Domain  | 125.6962                | 78.4739                       | 1.6018    | 0.4711        |
| 11  | Vorinostat (SAHA, MK0683) | Autophagy,HDAC            | 85.1040                 | 53.6983                       | 1.5849    | 0.4605        |
| 12  | GSK591                    | Histone Methyltransferase | 46.4104                 | 30.8970                       | 1.5021    | 0.4069        |
| 13  | GSK2879552 2HCl           | Histone Demethylase       | 108.3068                | 72.8011                       | 1.4877    | 0.3972        |

|    |                                 |                           |          |          |        |        |
|----|---------------------------------|---------------------------|----------|----------|--------|--------|
| 14 | MS023                           | Histone Methyltransferase | 81.8492  | 55.8344  | 1.4659 | 0.3825 |
| 15 | UNC0631                         | Histone Methyltransferase | 106.1669 | 72.7207  | 1.4599 | 0.3784 |
| 16 | I-BRD9                          | Epigenetic Reader Domain  | 130.5817 | 90.2462  | 1.4469 | 0.3695 |
| 17 | GSK J4 HCl                      | Histone Demethylase       | 114.5674 | 80.5922  | 1.4216 | 0.3518 |
| 18 | Resveratrol                     | Autophagy, Sirtuin        | 79.9374  | 56.3653  | 1.4182 | 0.3494 |
| 19 | CPI-360                         | Histone Methyltransferase | 132.1917 | 94.1165  | 1.4046 | 0.3397 |
| 20 | EI1                             | Histone Methyltransferase | 134.8450 | 96.8045  | 1.3930 | 0.3314 |
| 21 | Resminostat                     | HDAC                      | 116.9897 | 84.7045  | 1.3812 | 0.3229 |
| 22 | Azacitidine                     | DNA Methyltransferase     | 76.8131  | 55.7507  | 1.3778 | 0.3205 |
| 23 | Anacardic Acid                  | Histone Acetyltransferase | 126.3835 | 93.9094  | 1.3458 | 0.2970 |
| 24 | Pinometostat (EPZ5676)          | Histone Methyltransferase | 128.1045 | 95.6640  | 1.3391 | 0.2920 |
| 25 | IOX1                            | Histone Demethylase       | 136.9123 | 102.4457 | 1.3364 | 0.2900 |
| 26 | MM-102                          | Histone Methyltransferase | 130.9758 | 98.3044  | 1.3323 | 0.2869 |
| 27 | 3-deazaneplanocin A (DZNeP) HCl | Histone Methyltransferase | 44.2137  | 33.3853  | 1.3243 | 0.2809 |
| 28 | SGC-CBP30                       | Epigenetic Reader Domain  | 105.1739 | 79.4922  | 1.3231 | 0.2800 |
| 29 | Sirtinol                        | Sirtuin                   | 121.7589 | 92.8411  | 1.3115 | 0.2712 |

|    |                         |                           |          |          |        |        |
|----|-------------------------|---------------------------|----------|----------|--------|--------|
| 30 | RVX-208                 | Epigenetic Reader Domain  | 115.3171 | 88.0289  | 1.3100 | 0.2700 |
| 31 | A-366                   | Histone Methyltransferase | 113.6294 | 87.6080  | 1.2970 | 0.2601 |
| 32 | HLCL-61 HCL             | Histone Methyltransferase | 118.3686 | 91.4414  | 1.2945 | 0.2581 |
| 33 | Entacapone              | Histone Methyltransferase | 114.6231 | 89.3578  | 1.2827 | 0.2490 |
| 34 | PF-CBP1 HCl             | Epigenetic Reader Domain  | 131.3057 | 102.9337 | 1.2756 | 0.2434 |
| 35 | Selisistat (EX 527)     | Sirtuin                   | 122.0661 | 96.2081  | 1.2688 | 0.2380 |
| 36 | SGC 0946                | Histone Methyltransferase | 124.2929 | 101.3269 | 1.2267 | 0.2043 |
| 37 | MS436                   | Epigenetic Reader Domain  | 131.4084 | 107.2657 | 1.2251 | 0.2030 |
| 38 | EPZ015666(GSK 3235025)  | Histone Methyltransferase | 63.6935  | 52.5473  | 1.2121 | 0.1924 |
| 39 | OG-L002                 | Histone Demethylase       | 119.7010 | 99.1064  | 1.2078 | 0.1888 |
| 40 | SP2509                  | Histone Demethylase       | 108.1256 | 89.7539  | 1.2047 | 0.1862 |
| 41 | GSK1324726A (I-BET726)  | Epigenetic Reader Domain  | 34.2109  | 28.6211  | 1.1953 | 0.1784 |
| 42 | C646                    | Histone Acetyltransferase | 109.6700 | 93.2274  | 1.1764 | 0.1624 |
| 43 | Tazemetostat (EPZ-6438) | Histone Methyltransferase | 108.2600 | 92.4028  | 1.1716 | 0.1584 |
| 44 | UNC0379                 | Histone Methyltransferase | 124.0722 | 107.2664 | 1.1567 | 0.1455 |
| 45 | CPI-169                 | Histone Methyltransferase | 113.6439 | 99.0954  | 1.1468 | 0.1370 |

|    |                            |                           |          |          |        |        |
|----|----------------------------|---------------------------|----------|----------|--------|--------|
| 46 | BRD4770                    | Histone Methyltransferase | 104.3161 | 91.3310  | 1.1422 | 0.1329 |
| 47 | I-BET-762                  | Epigenetic Reader Domain  | 98.5199  | 86.4777  | 1.1393 | 0.1304 |
| 48 | EPZ011989                  | Histone Methyltransferase | 110.9441 | 98.2842  | 1.1288 | 0.1212 |
| 49 | GSK503                     | Histone Methyltransferase | 111.6068 | 100.5174 | 1.1103 | 0.1047 |
| 50 | GSK J1                     | Histone Demethylase       | 114.5153 | 103.2326 | 1.1093 | 0.1037 |
| 51 | MI-2 (Menin-MLL Inhibitor) | Histone Methyltransferase | 106.1766 | 95.7684  | 1.1087 | 0.1032 |
| 52 | Ricolinostat (ACY-1215)    | HDAC                      | 123.7827 | 112.4686 | 1.1006 | 0.0959 |
| 53 | PFI-3                      | Epigenetic Reader Domain  | 109.6727 | 99.7899  | 1.0990 | 0.0944 |
| 54 | CUDC-101                   | EGFR,HDAC,HER2            | 108.1309 | 98.6469  | 1.0961 | 0.0918 |
| 55 | ORY-1001 (RG-6016) 2HCl    | Histone Demethylase       | 97.3309  | 89.8649  | 1.0831 | 0.0798 |
| 56 | Decitabine                 | DNA Methyltransferase     | 69.4644  | 64.3326  | 1.0798 | 0.0767 |
| 57 | BIX 01294                  | Histone Methyltransferase | 96.3844  | 89.4609  | 1.0774 | 0.0745 |
| 58 | MG149                      | Histone Acetyltransferase | 99.5402  | 92.9287  | 1.0711 | 0.0687 |
| 59 | EPZ004777                  | Histone Methyltransferase | 124.2779 | 116.1957 | 1.0696 | 0.0672 |
| 60 | Zebularine                 | DNA Methyltransferase     | 88.9890  | 84.0514  | 1.0587 | 0.0571 |
| 61 | SGC707                     | Histone Methyltransferase | 109.1321 | 103.8989 | 1.0504 | 0.0491 |

|    |                              |                           |          |          |        |         |
|----|------------------------------|---------------------------|----------|----------|--------|---------|
| 62 | GSK-LSD1 2HCl                | Histone Demethylase       | 112.4758 | 111.1408 | 1.0120 | 0.0119  |
| 63 | ML324                        | Histone Demethylase       | 105.4068 | 104.7124 | 1.0066 | 0.0066  |
| 64 | SRT1720 HCl                  | Sirtuin                   | 103.9234 | 103.2587 | 1.0064 | 0.0064  |
| 65 | Tranylcypromine (2-PCPA) HCl | MAO                       | 93.4334  | 97.8887  | 0.9545 | -0.0466 |
| 66 | PFI-2 HCl                    | Histone Methyltransferase | 102.0973 | 110.9315 | 0.9204 | -0.0830 |
| 67 | CPI-203                      | Epigenetic Reader Domain  | 26.1302  | 29.1574  | 0.8962 | -0.1096 |



**Supplementary Table 2: Epigenetic Drug screen in SKOV3**

| NO. | Drugs                 | Target                    | Single Survival rate(%) | Combination Survival rate (%) | S/C score | ln(S/C score) |
|-----|-----------------------|---------------------------|-------------------------|-------------------------------|-----------|---------------|
| 1   | Trichostatin A (TSA)  | HDAC                      | 20.5482                 | 7.9253                        | 2.5927    | 0.9527        |
| 2   | Belinostat (PXD101)   | HDAC                      | 117.0505                | 68.8072                       | 1.7011    | 0.5313        |
| 3   | Panobinostat (LBH589) | HDAC                      | 62.6669                 | 37.0716                       | 1.6904    | 0.5250        |
| 4   | SGC707                | Histone Methyltransferase | 108.1856                | 67.1334                       | 1.6115    | 0.4772        |
| 5   | Entinostat (MS-275)   | HDAC                      | 105.7573                | 65.8123                       | 1.6070    | 0.4743        |
| 6   | Pracinostat (SB939)   | HDAC                      | 115.4338                | 72.6133                       | 1.5897    | 0.4635        |
| 7   | Decitabine            | DNA Methyltransferase     | 109.6138                | 69.3466                       | 1.5807    | 0.4578        |
| 8   | MG149                 | Histone Acetyltransferase | 111.0907                | 72.0101                       | 1.5427    | 0.4335        |
| 9   | MS023                 | Histone Methyltransferase | 100.5443                | 65.2291                       | 1.5414    | 0.4327        |
| 10  | SRT1720 HCl           | Sirtuin                   | 112.3432                | 73.4215                       | 1.5301    | 0.4253        |
| 11  | EPZ011989             | Histone Methyltransferase | 108.2717                | 71.0259                       | 1.5244    | 0.4216        |
| 12  | Sirtinol              | Sirtuin                   | 107.1955                | 71.5905                       | 1.4973    | 0.4037        |
| 13  | Selisistat (EX 527)   | Sirtuin                   | 108.4862                | 72.8909                       | 1.4883    | 0.3977        |
| 14  | I-BRD9                | Epigenetic Reader Domain  | 115.4864                | 77.8278                       | 1.4839    | 0.3947        |

|    |                           |                           |          |         |        |        |
|----|---------------------------|---------------------------|----------|---------|--------|--------|
| 15 | EI1                       | Histone Methyltransferase | 108.1101 | 73.4723 | 1.4714 | 0.3862 |
| 16 | C646                      | Histone Acetyltransferase | 109.3530 | 74.3815 | 1.4702 | 0.3854 |
| 17 | Vorinostat (SAHA, MK0683) | HDAC                      | 108.3341 | 73.7851 | 1.4682 | 0.3841 |
| 18 | Entacapone                | Histone Methyltransferase | 109.2628 | 74.4822 | 1.4670 | 0.3832 |
| 19 | GSK503                    | Histone Methyltransferase | 101.6588 | 70.5007 | 1.4420 | 0.3660 |
| 20 | Azacitidine               | DNA Methyltransferase     | 97.9930  | 67.9717 | 1.4417 | 0.3658 |
| 21 | GSK591                    | Histone Methyltransferase | 97.9775  | 68.2039 | 1.4365 | 0.3622 |
| 22 | ORY-1001 (RG-6016) 2HCl   | Histone Demethylase       | 108.2746 | 75.5895 | 1.4324 | 0.3594 |
| 23 | GSK1324726A (I-BET726)    | Epigenetic Reader Domain  | 59.6592  | 41.6556 | 1.4322 | 0.3592 |
| 24 | I-BET-762                 | Epigenetic Reader Domain  | 92.2519  | 64.5080 | 1.4301 | 0.3577 |
| 25 | Ricolinostat (ACY-1215)   | HDAC                      | 114.3610 | 80.0679 | 1.4283 | 0.3565 |
| 26 | PFI-1 (PF-6405761)        | Epigenetic Reader Domain  | 86.1297  | 60.4274 | 1.4253 | 0.3544 |
| 27 | EPZ015666(GSK3 235025)    | Histone Methyltransferase | 105.3885 | 74.8088 | 1.4088 | 0.3427 |
| 28 | Zebularine                | DNA Methyltransferase     | 106.4758 | 75.6744 | 1.4070 | 0.3415 |
| 29 | UNC0379                   | Histone Methyltransferase | 101.1044 | 71.9395 | 1.4054 | 0.3403 |
| 30 | OTX015                    | Epigenetic Reader Domain  | 69.7096  | 49.6353 | 1.4044 | 0.3396 |

|    |                              |                           |          |         |        |        |
|----|------------------------------|---------------------------|----------|---------|--------|--------|
| 31 | Tranylcypromine (2-PCPA) HCl | MAO                       | 96.4289  | 68.7438 | 1.4027 | 0.3384 |
| 32 | SGC-CBP30                    | Epigenetic Reader Domain  | 86.8187  | 62.1441 | 1.3971 | 0.3344 |
| 33 | RVX-208                      | Epigenetic Reader Domain  | 104.4566 | 75.0283 | 1.3922 | 0.3309 |
| 34 | MM-102                       | Histone Methyltransferase | 101.9356 | 73.8881 | 1.3796 | 0.3218 |
| 35 | ML324                        | Histone Demethylase       | 106.9088 | 77.8146 | 1.3739 | 0.3176 |
| 36 | OF-1                         | Epigenetic Reader Domain  | 99.4895  | 72.9435 | 1.3639 | 0.3104 |
| 37 | PF-CBP1 HCl                  | Epigenetic Reader Domain  | 109.1044 | 80.1819 | 1.3607 | 0.3080 |
| 38 | Pinometostat (EPZ5676)       | Histone Methyltransferase | 110.5526 | 81.3915 | 1.3583 | 0.3062 |
| 39 | Tazemetostat (EPZ-6438)      | Histone Methyltransferase | 107.9590 | 79.7153 | 1.3543 | 0.3033 |
| 40 | CPI-203                      | Epigenetic Reader Domain  | 51.7473  | 38.2144 | 1.3541 | 0.3032 |
| 41 | PFI-3                        | Epigenetic Reader Domain  | 106.0540 | 78.5358 | 1.3504 | 0.3004 |
| 42 | CUDC-101                     | EGFR,HDAC,HER2            | 77.2812  | 57.3037 | 1.3486 | 0.2991 |
| 43 | GSK J4 HCl                   | Histone Demethylase       | 108.8677 | 80.8863 | 1.3459 | 0.2971 |
| 44 | BRD4770                      | Histone Methyltransferase | 113.5446 | 84.5996 | 1.3421 | 0.2943 |
| 45 | CPI-360                      | Histone Methyltransferase | 102.8241 | 77.0596 | 1.3343 | 0.2884 |
| 46 | OG-L002                      | Histone Demethylase       | 105.4126 | 79.0021 | 1.3343 | 0.2884 |

|    |                            |                           |          |         |        |        |
|----|----------------------------|---------------------------|----------|---------|--------|--------|
| 47 | A-366                      | Histone Methyltransferase | 110.3449 | 83.0747 | 1.3283 | 0.2839 |
| 48 | JIB-04                     | Histone Demethylase       | 74.4364  | 56.6495 | 1.3140 | 0.2731 |
| 49 | Resminostat                | HDAC                      | 95.0351  | 72.4838 | 1.3111 | 0.2709 |
| 50 | (+)-JQ1                    | Epigenetic Reader Domain  | 54.2927  | 41.7098 | 1.3017 | 0.2637 |
| 51 | Resveratrol                | Autophagy, Sirtuin        | 105.0395 | 81.3833 | 1.2907 | 0.2552 |
| 52 | GSK J1                     | Histone Demethylase       | 99.4753  | 77.5943 | 1.2820 | 0.2484 |
| 53 | UNC0631                    | Histone Methyltransferase | 104.7027 | 82.0249 | 1.2765 | 0.2441 |
| 54 | CPI-169                    | Histone Methyltransferase | 107.9718 | 84.6150 | 1.2760 | 0.2438 |
| 55 | SGC 0946                   | Histone Methyltransferase | 110.2350 | 86.5344 | 1.2739 | 0.2421 |
| 56 | IOX1                       | Histone Demethylase       | 103.4030 | 81.7943 | 1.2642 | 0.2344 |
| 57 | MI-2 (Menin-MLL Inhibitor) | Histone Methyltransferase | 101.5644 | 80.6548 | 1.2592 | 0.2305 |
| 58 | Anacardic Acid             | Histone Acetyltransferase | 96.3488  | 76.9819 | 1.2516 | 0.2244 |
| 59 | PFI-2 HCl                  | Histone Methyltransferase | 97.2941  | 79.0216 | 1.2312 | 0.2080 |
| 60 | MS436                      | Epigenetic Reader Domain  | 101.0908 | 82.3187 | 1.2280 | 0.2054 |
| 61 | EPZ004777                  | Histone Methyltransferase | 101.9790 | 83.5759 | 1.2202 | 0.1990 |
| 62 | SP2509                     | Histone Demethylase       | 37.5530  | 30.8832 | 1.2160 | 0.1955 |

|    |                                 |                           |          |         |        |        |
|----|---------------------------------|---------------------------|----------|---------|--------|--------|
| 63 | BIX 01294                       | Histone Methyltransferase | 108.5704 | 92.1021 | 1.1788 | 0.1645 |
| 64 | GSK-LSD1 2HCl                   | Histone Demethylase       | 104.1881 | 88.7964 | 1.1733 | 0.1599 |
| 65 | GSK2879552 2HCl                 | Histone Demethylase       | 99.8545  | 86.1814 | 1.1587 | 0.1473 |
| 66 | HLCL-61 HCl                     | Histone Methyltransferase | 90.4383  | 79.9542 | 1.1311 | 0.1232 |
| 67 | 3-deazaneplanocin A (DZNeP) HCl | Histone Methyltransferase | 66.4298  | 65.7871 | 1.0098 | 0.0097 |

**Supplementary Table 3 qRT-PCR primer, CHIP-qPCR primer, and siRNA sequence**

| 1.qRT-PCR primer   |         |                         |
|--------------------|---------|-------------------------|
| Genes              |         | Oligonucleotide (5'-3') |
| DUSP6              | Forward | GTTCTACCTGGAAGATGAA     |
|                    | Reverse | ATAAGGTAAGCCACAGTC      |
| ETV4               | Forward | TGGAAATCAGGAACAACTGC    |
|                    | Reverse | GCCCCTCGACTCTGAAGAT     |
| ETV5               | Forward | GGATCTCAGTCAACTTCAAG    |
|                    | Reverse | AAGCACCAGGTTATCAGA      |
| SPRY2-V1           | Forward | CATTCGCTCATCTGCCAGGA    |
|                    | Reverse | CACATCTGAACTCCGTGATCG   |
| SPRY2-V2           | Forward | CTCTCTCCGTTCTTCGTGG     |
|                    | Reverse | TCACTCCAGCAGGCTTAGAA    |
| SPRY2-V3           | Forward | CGTTTGTCACTGCCTTGTT     |
|                    | Reverse | GTCACCTCCAGCAGGCTTAGA   |
| SPRY2-V4           | Forward | CAGTCCGCTGGAGAAACTC     |
|                    | Reverse | GAAGTGTGGTCACTCCAGCA    |
| SPRY2-All variants | Forward | CCTACTGTCGTCCCAAGACCT   |
|                    | Reverse | GGGGCTCGTGCAGAAGAAT     |
| SPRY4              | Forward | CTCCTCAAAGGCCCTAG       |
|                    | Reverse | GGTTGTCTATGTAGTATTCTC   |
| 18S                | Forward | GTAACCCGTTGAACCCATT     |
|                    | Reverse | CCATCCAATCGGTAGTAGCG    |

| 2.CHIP-qPCR primer |         |                         |
|--------------------|---------|-------------------------|
| Genes              |         | Oligonucleotide (5'-3') |
| DUSP6              | Forward | CTTAGTGACCGATGAGGTGTT   |
|                    | Reverse | TTCTGCACAACCAGACGTT     |
| ETV4               | Forward | CGGTTTGTCTCTCTGTCTCTT   |
|                    | Reverse | CCCGCTTCTCGCAGAAAT      |
| ETV5               | Forward | TTCTGTAGTCGAGGTGAGACA   |
|                    | Reverse | CCCGTTTCGAGGGATTAG      |
| SPRY2              | Forward | TTACAAGTATCCGCCACCAAG   |
|                    | Reverse | TTGAGGTCAGGAGTTCGAGA    |
| SPRY4              | Forward | GGTGAGGATTGGTGAGTGAAT   |
|                    | Reverse | CTGGCTGAGTTGCCAGAAT     |
| NC                 | Forward | CGGTATGGAGCCCTGAAGACT   |
|                    | Reverse | AGGTGAGGGAGGTGGCTTAGA   |
| OUT                | Forward | GAGCAGCTCCTGGATCACT     |
|                    | Reverse | GCCAGTAACTCTGGAAGCATGT  |
| ACTB               | Forward | AAGCCGGCCTTGACAT        |
|                    | Reverse | GCTATTCTCGCAGCTCACCAT   |
| GAB2               | Forward | CTCGGTGTCGATCGATTTT     |
|                    | Reverse | GAACCTGACCCGAGAAATGT    |

| 3.siRNA sequence |                          |
|------------------|--------------------------|
| siRNAs           | Oligonucleotide (5'-3')  |
| NC               | UUCUCCGAACGUGUCACGUTT    |
| siDUSP6#1        | CGGACACUAUUAUCACUAATT    |
| siDUSP6#2        | CCGGCAUCAAGUACAUCUUGAATT |
| siETV5#1         | CAGGGAAAUCUCGAUCUGATT    |
| siETV5#2         | GCUCUCUCCGCUAUUACUATT    |
| siSPRY4#1        | GACCAGCCAUGUGGAGAAUdTdT  |
| siSPRY4#2        | UCAACUAUGGCACGUGCAUdTdT  |
